# Supplementary material
Source: Research Square preprint supplement (doi:10.21203/rs.3.rs-10031195/v1)
Supplement: Supplementary file 1 [file 159d6e755236245facf5bbd4.docx]

**Toughening Performance of ASA Core-shell Graft Copolymers Constructed with Various Crosslinking Agents on SAN Resins**

- **DMA crosslinking agent improved the elongation at break and impact strength of SAN resin material, thereby further enhancing the tensile strength.**
- **The ASA-grafted powder has the highest grafting rate (34.6%) and shows the most significant toughening effect on SAN, with the impact strength increasing to 21.7 kJ/m2, more than 6 times higher than that of pure**
- **When the SAN.SAN/ASA mass ratio is 35/25, the tensile strength is 32.23 MPa, and the elongation at break reaches 28.44%.**
