# Supplementary material
Source: Research Square preprint supplement (doi:10.21203/rs.3.rs-10031195/v1)

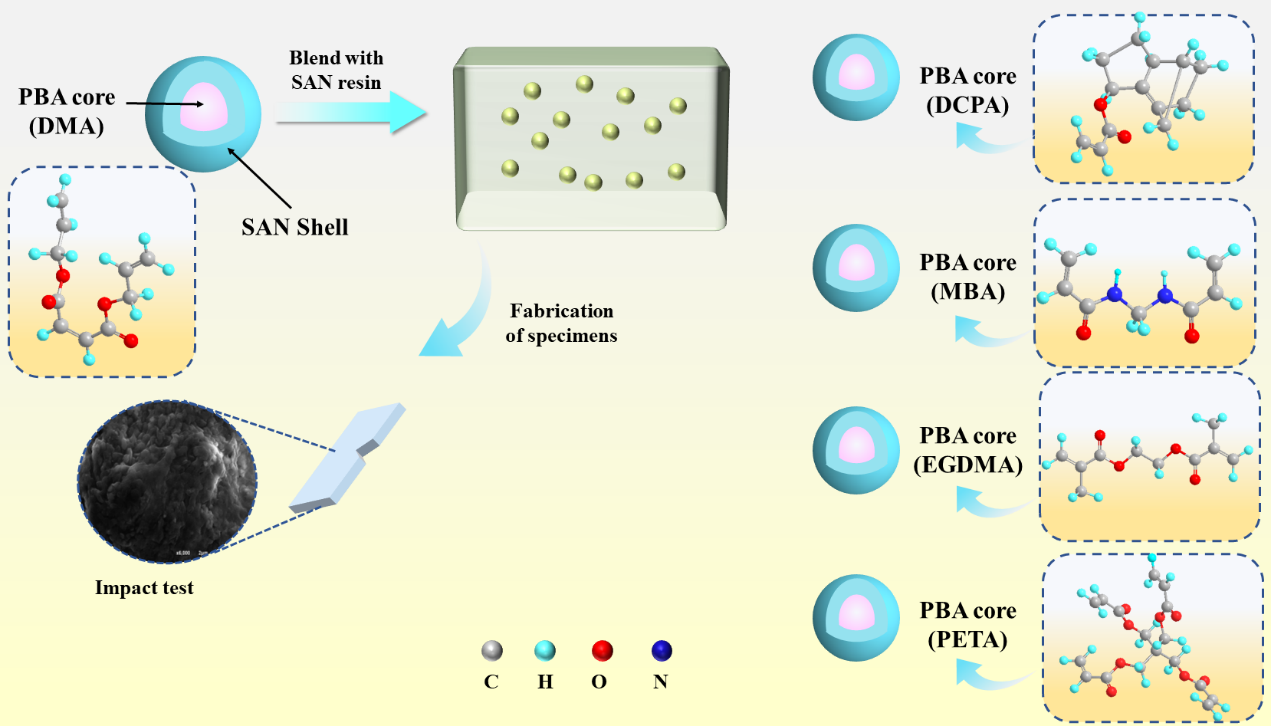

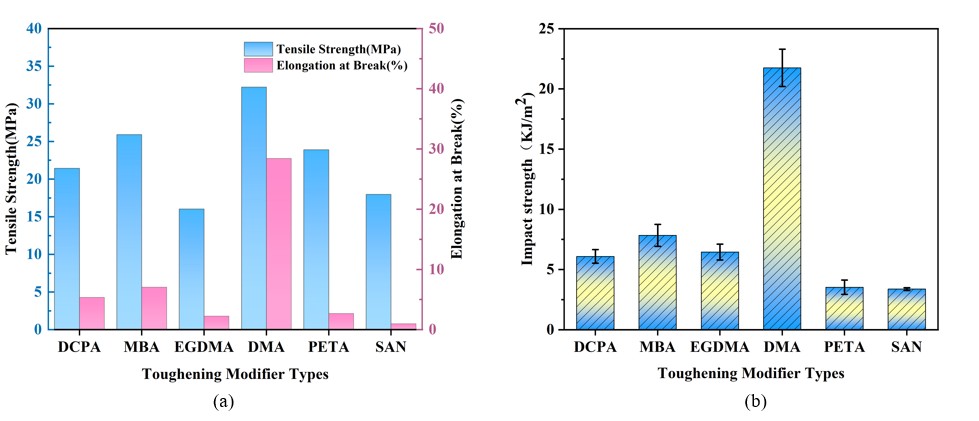

Supplement: Supplementary file 2 [file ccb71d4c4832371973bcb138.docx]
